# Supplementary material for: Informational Cost and Networks Navigability
Source: Research Square preprint supplement (doi:10.21203/rs.3.rs-112637/v1), 2020-11-23
Supplement: Supplementary file 1 [file 8c51965b72419ae906086ceb.xlsx]

## Sheet: Sheet1
No.	network	Type	n	m	density	S	Energy	Purity	SP
1	Ants	Undirected	74	97	0.0359126	3.1897	-2.38573	0.0780551	0.958534
2	Benguela	Directed	29	203	0.25	2.64212	-1.45508	0.147466	0.991379
3	BridgeBrook	Directed	75	553	0.0996396	3.17324	-1.69672	0.180266	0.998739
4	Canton	Directed	108	708	0.0612669	4.67314	-0.0247751	0.00950225	0.996625
5	Centrality	Directed	118	613	0.044401	4.77068	0	0.00847458	0.994423
6	Chesapeake	Directed	33	72	0.0681818	3.46897	-0.0782954	0.0326783	0.999053
7	Coachella	Directed	30	290	0.333333	0.285453	-7.22519	0.915319	0.983908
8	College	Undirected	32	36	0.0725806	2.41399	-5.10266	0.201752	1
9	ColoSpg	Undirected	324	347	0.0066315	4.32385	-2.72294	0.0375097	0.906261
10	Corporate	Undirected	1586	11540	0.00918128	0.200344	-24.0633	0.934345	0.261667
11	Dolphins	Undirected	62	159	0.0840825	1.30109	-6.32882	0.456838	0.782655
12	Drugs	Undirected	616	2012	0.0106219	0.221058	-17.8304	0.920855	0.358299
13	Electronic1	Directed	122	189	0.0128031	4.70347	-0.148097	0.011093	1
14	Electronic2	Directed	252	399	0.0063081	5.43067	-0.145308	0.0053464	0.998451
15	Electronic3	Directed	512	819	0.00313035	6.14042	-0.143977	0.00262578	0.998173
16	ElVerde	Directed	156	1510	0.0624483	0.0643778	-10.1916	0.988328	0.89938
17	Galesburg	Undirected	31	67	0.144086	1.16318	-4.91557	0.555927	0.909677
18	Hi_tech	Undirected	33	91	0.172348	0.28954	-7.70078	0.908308	0.785985
19	Internet1997	Directed	3015	5156	0.000567391	8.01136	0	0.000331675	0.999419
20	Internet1998	Directed	3522	6324	0.00050996	8.16678	0	0.00028393	0.998965
21	LittleRock	Directed	181	2378	0.0729896	0.868546	-7.3404	0.676618	0.992848
22	Neurons	Directed	280	2170	0.0277778	0.657437	-8.59804	0.812277	0.42948
23	ODLIS	Directed	2898	18244	0.00217307	0.296766	-12.7758	0.93636	0.458897
24	Power_grid	Undirected	4941	6594	0.000540303	6.80622	-3.16245	0.00964188	0.670212
25	PPI_Afulgidus	Undirected	32	80	0.16129	1.18124	-2.54841	0.547029	0.83871
26	PPI_Bsubtilis	Undirected	84	98	0.0281124	2.81541	-3.04874	0.14372	0.876936
27	PPI_Ecoli	Undirected	230	695	0.0263907	0.00953398	-15.9225	0.998	0.563699
28	PPI_Human	Undirected	2783	6007	0.00155173	0.278928	-16.0061	0.91011	0.245383
29	PPI_Malaria	Undirected	229	604	0.0231364	0.988736	-9.03412	0.63124	0.394277
30	Prison	Undirected	67	142	0.0642243	2.3109	-4.25103	0.187739	0.881502
31	ReefSmall	Directed	50	556	0.226939	0.111796	-8.52776	0.975807	0.892245
32	Roget	Directed	994	5059	0.00512542	3.82612	-5.31761	0.12203	0.460785
33	Sawmill	Undirected	36	62	0.0984127	1.78569	-3.76185	0.340657	0.780952
34	ScotchBroom	Directed	154	370	0.0157033	5.01303	-0.0675882	0.00693799	1
35	Shelf	Directed	81	1483	0.228858	2.61447	-2.90595	0.28098	0.959722
36	Skipwith	Directed	35	380	0.319328	0.664525	-5.44244	0.807939	1
37	SmallWorld	Directed	233	994	0.0183883	5.45104	0	0.00429185	0.996855
38	Software_Abi	Directed	1035	1798	0.00168008	6.70399	-0.380305	0.00309929	0.994447
39	Software_Mysql	Directed	1480	4230	0.00193246	7.27039	-0.0750494	0.000732247	0.997287
40	Software_VTK	Directed	771	1374	0.00231442	6.61699	-0.0721519	0.00143115	0.999099
41	Software_XMMS	Directed	971	1809	0.00192065	6.87128	-0.0171573	0.0010511	0.999844
42	StMarks	Directed	51	270	0.105882	2.4219	-2.2281	0.298934	0.985882
43	StMartin	Directed	44	218	0.115222	3.78419	0	0.0227273	0.986786
44	Stony	Directed	112	832	0.0669241	4.70163	-0.0470957	0.00936379	0.999517
45	Termite_1	Undirected	507	676	0.00527009	4.97655	0	0.00197239	0.738304
46	Termite_2	Undirected	260	280	0.00831601	4.62304	0	0.00384615	0.893644
47	Termite_3	Undirected	268	437	0.0122142	3.43608	0	0.00373134	0.611912
48	Trans_Ecoli	Directed	328	456	0.00425151	5.79301	0	0.00304878	1
49	Trans_urchin	Directed	45	83	0.0419192	3.74213	-0.115575	0.0267445	0.998485
50	Transc_yeast	Directed	662	1063	0.00242926	6.49156	-0.00617116	0.00152898	1
51	USAir97	Undirected	332	2126	0.0386925	1.01608e-09	-41.2334	1	0.404561
52	Ythan2	Directed	92	421	0.0502867	4.45387	-0.158648	0.0132925	0.996297
53	Zackary	Undirected	34	78	0.139037	0.777495	-6.17068	0.66074	0.821747
54	GD	Undirected	249	635	0.0205661	1.60818	-8.07274	0.415849	0.544792
55	Geom	Undirected	3621	9461	0.00144354	0.00057332	-29.0258	0.999899	0.14448
56	PPI_ Yeast	Undirected	2224	6609	0.00267357	0.220548	-19.3043	0.913508	0.274793
57	PPI_Hpyroli	Undirected	710	1396	0.0055464	1.31777	-9.41807	0.590725	0.464391
58	PPI_KHSV	Undirected	50	114	0.0930612	0.579104	-7.22728	0.825055	0.564898
